# Supplementary material
Source: Research Square preprint supplement (doi:10.21203/rs.3.rs-9337728/v1)
Supplement: Supplementary file 1 [file 0af5c9540672580d3e421cf9.xlsx]

## Sheet: Supplementary table 1.
	Pre	1M	6M	12M	P<.05
	( N=60 )	( N=60 )	( N=60 )	( N=60 )
BSFS, score	3.28 ± 1.08	4.68 ± 1.03	3.88 ± 0.81	3.73 ± 0.64	<.01
BSFS, n (%)	5 ( 8.2 )	0 ( 0 )	2 ( 3.3 )	0 ( 0 )
1
2	10 ( 16.4 )	1 ( 1.6 )	2 ( 3.3 )	5 ( 8.3 )
3	12 ( 19.7 )	2 ( 3.8 )	3 ( 8.3 )	7 ( 11.7 )
4	31 ( 50.6 )	27 ( 44.3 )	44 ( 73.3 )	47 ( 78.3 )
5	3 ( 4.9 )	18 ( 29.5 )	7 ( 11.7 )	1 ( 1.7 )
6	0 ( 0 )	10 ( 16.4 )	0 ( 0 )	0 ( 0 )
7	0 ( 0 )	3 ( 4.9 )	0 ( 0 )	0 ( 0 )
Supplementary table 1. Bristol Stool Form Scale (BSFS).
BSFS classifies stool consistency on a 7-point scale, ranging from type 1 (hard lumps) to type 7 (watery stools). Higher scores indicate looser stool consistency.
P values were calculated using the Wilcoxon signed-rank test for comparisons between preoperative and 1-month postoperative scores, Continuous variables are presented as median (interquartile range (IQR)), Pre: Preoperative, 1M: 1 month postoperative, 6M: 6 month postoperative, 12M: 12 month postoperative.

## Sheet: Supplementary table 2.
a.	Pre	1M	6M	12M	P<.05
	( N=60 )	( N=60 )	( N=60 )	( N=60 )
CSS, score	1.88 ± 3.42	2.13 ± 2.66	1.44 ± 2.40	0.78 ± 2.23	0.16
Frequency of bowel movements	0.15 ± 0.44	0.03 ± 0.18	0.02 ± 0.13	0.07 ± 0.37	<0.01
Difficulty of evacuation	0.58 ± 1.11	0.25 ± 0.70	0.37 ± 0.98	0.27 ± 0.83	0.06
Incomplete evacuation	0.48 ± 1.02	1.12 ± 1.42	0.49 ± 1.12	0.27 ± 0.83	<0.01
Abdominal pain	0.27 ± 0.66	0.47 ± 0.91	0.41 ± 0.95	0.12 ± 0.46	0.04
Time per defecation attempt	0.23 ± 0.62	0.12 ± 0.37	0.08 ± 0.28	0.10 ± 0.36	0.22
Assistance for defecation	0.07 ± 0.41	0.02 ± 0.13	0.03 ± 0.26	0.00 ± 0.00	0.58
Failure of defecation within 24 hours	0.20 ± 0.63	0.13 ± 0.54	0.03 ± 0.26	0.10 ± 0.44	0.73
Duration of constipation	0.07 ± 0.25	0.00 ± 0.00	0.00 ± 0.00	0.02 ± 0.13	0.07
b.	Pre	1M	6M	12M	P<.05
	( N=60 )	( N=60 )	( N=60 )	( N=60 )
CSS, score	0 ( 0-15 )	2 ( 0-10 )	0 ( 0-10 )	0 ( 0-11 )	0.16
Frequency of bowel movements	0 ( 0-2 )	0 ( 0-1 )	0 ( 0-1 )	0 ( 0-2 )	<0.01
Difficulty of evacuation	0 ( 0-3 )	0 ( 0-3 )	0 ( 0-4 )	0 ( 0-3 )	0.06
Incomplete evacuation	0 ( 0-4 )	0 ( 0-4 )	0 ( 0-4 )	0 ( 0-3 )	<0.01
Abdominal pain	0 ( 0-2 )	0 ( 0-3 )	0 ( 0-3 )	0 ( 0-2 )	0.04
Time per defecation attempt	0 ( 0-3 )	0 ( 0-1 )	0 ( 0-1 )	0 ( 0-2 )	0.22
Assistance for defecation	0 ( 0-3 )	0 ( 0-1 )	0 ( 0-2 )	0 ( 0-1 )	0.58
Failure of defecation within 24 hours	0 ( 0-3 )	0 ( 0-3 )	0 ( 0-2 )	0 ( 0-0 )	0.73
Duration of constipation	0 ( 0-1 )	0 ( 0-0 )	0 ( 0-0 )	0 ( 0-1 )	0.07
Supplementary table 2. The Constipation Scoring System (CSS).
CSS consists of eight items, including bowel movement frequency, difficulty of evacuation, incomplete evacuation, and abdominal pain, where higher scores reflect more severe symptoms of constipation. Higher scores indicate more severe bowel dysfunction.
P values were calculated using the Wilcoxon signed-rank test for comparisons between preoperative and 1-month postoperative scores, Continuous variables are presented as mean ± standard deviation (SD) in (a); as median (interquartile range (IQR)) in (b), Pre: Preoperative, 1M: 1 month postoperative, 6M: 6 month postoperative, 12M: 12 month postoperative.

## Sheet: Supplementary table 3.
a.	Pre	1M	6M	12M	P<.05
	( N=60 )	( N=60 )	( N=60 )	( N=60 )
The Wexner score, score	0.38 ± 0.85	0.83 ± 1.60	0.27 ± 1.00	0.19 ± 0.66	0.07
Incontinence to solid stool	0.00 ± 0.00	0.02 ± 0.13	0.00 ± 0.00	0.00 ± 0.00	1
Incontinence to liquid stool	0.00 ± 0.00	0.15 ± 0.48	0.08 ± 0.47	0.00 ± 0.00	0.05
Incontinence to gas	0.48 ± 0.98	0.63 ± 1.25	0.29 ± 0.87	0.19 ± 0.66	0.38
Need to wear a pad or diaper	0.00 ± 0.00	0.03 ± 0.26	0.03 ± 0.26	0.00 ± 0.00	1
Lifestyle alteration	0.00 ± 0.00	0.00 ± 0.00	0.00 ± 0.00	0.00 ± 0.00	NA
b.	Pre	1M	6M	12M	P<.05
	( N=60 )	( N=60 )	( N=60 )	( N=60 )
The Wexner score, score	0.38 ± 0.85	0.83 ± 1.60	0.27 ± 1.00	0.19 ± 0.66	0.07
Incontinence to solid stool	0.00 ± 0.00	0.02 ± 0.13	0.00 ± 0.00	0.00 ± 0.00	1
Incontinence to liquid stool	0.00 ± 0.00	0.15 ± 0.48	0.08 ± 0.47	0.00 ± 0.00	0.05
Incontinence to gas	0.48 ± 0.98	0.63 ± 1.25	0.29 ± 0.87	0.19 ± 0.66	0.38
Need to wear a pad or diaper	0.00 ± 0.00	0.03 ± 0.26	0.03 ± 0.26	0.00 ± 0.00	1
Lifestyle alteration	0.00 ± 0.00	0.00 ± 0.00	0.00 ± 0.00	0.00 ± 0.00	NA
Supplementary table 3. The Wexner score.
The Wexner score evaluates fecal incontinence based on five items: incontinence to gas, liquid stool, and solid stool, pad use, and lifestyle alteration.Scores range from 0 to 20, with higher scores indicating more severe incontinence.
P values were calculated using the Wilcoxon signed-rank test for comparisons between preoperative and 1-month postoperative scores, Continuous variables are presented as mean ± standard deviation (SD) in (a); as median (interquartile range (IQR)) in (b), Pre: Preoperative, 1M: 1 month postoperative, 6M: 6 month postoperative, 12M: 12 month postoperative.

## Sheet: Supplementary table ４.
Supplementary table 4. Linear mixed-effects model results for longitudinal changes in α-diversity.
(A) LMM ANOVA (Main effect of time)
Index	NumDF	DenDF	F	p
Shannon	2	117.21	16.41	5.20×10⁻⁷
Simpson	2	117.39	2.23	0.112
Observed richness	2	117.24	30.05	2.90×10⁻¹¹
Hill number (q=1)	2	117.24	30.05	2.90×10⁻¹¹
(B) Post hoc comparisons (Holm-adjusted)
Shannon
Comparison	Estimate	SE	p
Pre–1M	0.441	0.079	4.32×10⁻⁷
Pre–6M	0.304	0.079	4.06×10⁻⁴
1M–6M	−0.137	0.079	0.086
Observed richness
Comparison	Estimate	SE	p
Pre–1M	47.85	6.7	2.49×10⁻¹⁰
Pre–6M	41.51	6.73	2.06×10⁻⁸
1M–6M	−6.34	6.73	0.348
Hill q=1
Comparison	Estimate	SE	p
Pre–1M	10.31	1.64	1.64×10⁻⁸
Pre–6M	7.56	1.65	2.21×10⁻⁵
1M–6M	−2.75	1.65	0.098

## Sheet: Supplementary table ５.
Supplementary table 6. Linear mixed-effects model analyses of α-diversity according to bowel function phenotypes.
Incomplete evacuation							BSFS							Incontinence to liquid stool
(A) Type III ANOVA (Satterthwaite’s method)
Index	Effect	NumDF	DenDF	F	p		Index	Effect	NumDF	DenDF	F	p		Index	Effect	NumDF	DenDF	F	p
Shannon	group	1	59.82	0.095	0.759		Shannon	group	1	59.76	0.117	0.734		Shannon	group	1	62.49	1.123	0.293
	time	2	119.12	13.03	7.65 × 10⁻⁶			time	2	119.06	16.16	6.16 × 10⁻⁷			time	2	121.42	2.402	0.0948
	group × time	2	119.12	1.24	0.294			group × time	2	119.06	0.781	0.46			group × time	2	121.42	1.51	0.225
Simpson	group	1	59.9	0.012	0.914		Simpson	group	1	59.81	0.0196	0.889		Simpson	group	1	63.14	1.617	0.208
	time	2	119.26	1.61	0.205			time	2	119.17	3.343	0.0387			time	2	122.09	0.258	0.773
	group × time	2	119.26	0.44	0.645			group × time	2	119.17	2.126	0.124			group × time	2	122.09	0.436	0.648
Observed richness	group	1	59.84	0.253	0.617		Observed richness	group	1	59.86	0.835	0.365		Observed richness	group	1	62.41	1.156	0.286
	time	2	119.12	26.07	4.06 × 10⁻¹⁰			time	2	119.14	23.81	2.00 × 10⁻⁹			time	2	121.33	6.44	0.0022
	group × time	2	119.12	0.418	0.659			group × time	2	119.14	0.255	0.776			group × time	2	121.33	0.934	0.396
Hill number (q = 1)	group	1	59.96	0.102	0.75		Hill number (q = 1)	group	1	59.92	0.0653	0.799		Hill number (q = 1)	group	1	61.91	0.251	0.618
	time	2	119.19	16.68	4.11 × 10⁻⁷			time	2	119.15	20.13	2.94 × 10⁻⁸			time	2	120.83	2.938	0.0568
	group × time	2	119.19	2.29	0.106			group × time	2	119.15	0.354	0.702			group × time	2	120.83	2.773	0.0665
(B) Post hoc comparisons within group (time contrasts)
Shannon (significant in Lighthearted group only)							Shannon							Shannon (significant in Lighthearted group only)
Group	Comparison	Estimate	SE	p			Group	Comparison	Estimate	SE	p			Group	Comparison	Estimate	SE	p
Lighthearted	Pre–1M	0.524	0.098	1.11 × 10⁻⁶			Aggravation	Pre–1M	0.408	0.0943	9.25 × 10⁻⁵			Lighthearted	Pre–1M	0.481	0.0826	1.42 × 10⁻⁷
Lighthearted	Pre–6M	0.373	0.098	4.57 × 10⁻⁴			Aggravation	Pre–6M	0.239	0.095	0.0261			Lighthearted	Pre–6M	0.339	0.0826	1.50 × 10⁻⁴
							Lighthearted	Pre–1M	0.518	0.144	0.0014
							Lighthearted	Pre–6M	0.451	0.144	0.00432
Observed richness							Observed richness							Observed richness (significant in Lighthearted group only)
Group	Comparison	Estimate	SE	p			Group	Comparison	Estimate	SE	p			Group	Comparison	Estimate	SE	p
Aggravation	Pre–1M	41.05	11.38	0.00135			Aggravation	Pre–1M	50.71	8.06	1.48 × 10⁻⁸			Lighthearted	Pre–1M	50.7	7.06	1.72 × 10⁻¹⁰
Aggravation	Pre–6M	34.1	11.38	0.00662			Aggravation	Pre–6M	43.96	8.12	6.16 × 10⁻⁷			Lighthearted	Pre–6M	43.57	7.06	1.79 × 10⁻⁸
Lighthearted	Pre–1M	51.51	8.35	2.73 × 10⁻⁸			Lighthearted	Pre–1M	41.17	12.31	0.00327
Lighthearted	Pre–6M	45.57	8.42	6.25 × 10⁻⁷			Lighthearted	Pre–6M	35.78	12.31	0.00865
Hill number (q = 1) (significant in Lighthearted group only)							Hill number							Hill number (q = 1) (significant in Lighthearted group only)
Group	Comparison	Estimate	SE	p			Group	Comparison	Estimate	SE	p			Group	Comparison	Estimate	SE	p
Lighthearted	Pre–1M	12.48	2.01	2.23 × 10⁻⁸			Aggravation	Pre–1M	9.66	1.97	8.58 × 10⁻⁶			Lighthearted	Pre–1M	11.29	1.7	2.60 × 10⁻⁹
Lighthearted	Pre–6M	9.74	2.03	8.92 × 10⁻⁶			Aggravation	Pre–6M	6.7	1.98	0.00196			Lighthearted	Pre–6M	8.66	1.7	2.57 × 10⁻⁶
							Lighthearted	Pre–1M	11.84	3.01	4.08 × 10⁻⁴
							Lighthearted	Pre–6M	9.55	3.01	0.00378

## Sheet: Supplementary table 6.
Supplementary table 6. PERMANOVA and PERMDISP results for longitudinal changes in gut microbial β-diversity.
(A) PERMANOVA (Effect of Time)
Effect	Df	Sum of Squares	R²	F	p
Model (time)	2	2.2332	0.033	3.006	0.001
Residual	176	65.3716	0.967	—	—
Total	178	67.6048	1	—	—
Bray–Curtis distance; 999 permutations; stratified by Patient ID to account for the paired design.
(B) PERMDISP (Test for Homogeneity of Multivariate Dispersion)
Test	Df	F	p
PERMDISP (parametric)	2176	3.664	0.0276
PERMDISP (permutation, 999)	2176	3.664	0.026

## Sheet: Supplementary table 7.
Supplementary table 7.Effects of time and bowel function phenotypes (residual stool sensation, BSFS, and fecal incontinence) on gut microbial β-diversity assessed by PERMANOVA and PERMDISP (Bray–Curtis distance, paired analysis).
Residual Stool Sensation							BSFS							Fecal Incontinence
(A) Overall PERMANOVA model								(A) Overall PERMANOVA model								(A) Overall PERMANOVA model
Effect	Df	Sum of Squares	R²	F	p			Effect	Df	Sum of Squares	R²	F	p			Effect	Df	Sum of Squares	R²	F	p
Model (time + group + interaction)	5	3.0549	0.0452	1.637	0.001			Model (time + group + interaction)	5	3.1251	0.0462	1.677	0.001			Model (time + group + interaction)	5	3.3628	0.0497	1.811	0.001
Residual	173	64.5499	0.9548	—	—			Residual	173	64.4797	0.9538	—	—			Residual	173	64.242	0.9503	—	—
Total	178	67.6048	1	—	—			Total	178	67.6048	1	—	—			Total	178	67.6048	1	—	—
(B) Interaction term								(B) Interaction term								(B) Interaction term
Effect	Df	R²	F	p				Effect	Df	R²	F	p				Effect	Df	R²	F	p
time × group	2	0.00721	0.653	0.632				time × group	2	0.00619	0.562	0.905				time × group	2	0.00564	0.513	0.986
(C) Pairwise PERMANOVA for time (paired)								(C) Pairwise PERMANOVA for time (paired)								(C) Pairwise PERMANOVA for time (paired)
Comparison	Df	R²	F	p	p_adj			Comparison	Df	R²	F	p	p_adj			Comparison	Df	R²	F	p	p_adj
Pre vs 1M	1	0.035	4.286	0.001	0.003			Pre vs 1M	1	0.035	4.286	0.001	0.003			Pre vs 1M	1	0.035	4.286	0.001	0.003
Pre vs 6M	1	0.0256	3.075	0.001	0.003			Pre vs 6M	1	0.0256	3.075	0.001	0.003			Pre vs 6M	1	0.0256	3.075	0.001	0.003
1M vs 6M	1	0.0139	1.645	0.001	0.003			1M vs 6M	1	0.0139	1.645	0.001	0.003			1M vs 6M	1	0.0139	1.645	0.001	0.003
(D) PERMDISP (dispersion test)								(D) PERMDISP (dispersion test)								(D) PERMDISP (dispersion test)
Effect	Df	F	p					Effect	Df	F	p					Effect	Df	F	p
group	1177	0.031	0.864					group	1177	6.73	0.017					group	1177	5.862	0.018
Effect	Df	F	p					Effect	Df	F	p					Effect	Df	F	p
time	2176	3.664	0.025					time	2176	3.664	0.03					time	2176	3.664	0.025
(E) Wilcoxon signed-rank test (Pre–1M vs 1M–6M)								(E) Wilcoxon signed-rank test (Pre–1M vs 1M–6M)								(E) Wilcoxon signed-rank test (Pre–1M vs 1M–6M)
Group	n	V	p	p_adj				Group	n	V	p	p_adj				Group	n	V	p	p_adj
Lighthearted	38	635	1.96×10⁻⁵	3.92×10⁻⁵				Lighthearted	18	167	0.000419	0.00042				Lighthearted	54	1270	9.37×10⁻⁷	1.87×10⁻⁶
Aggravation	21	207	0.00156	0.00156				Aggravation	41	706	7.13×10⁻⁵	0.00014				Aggravation	5	15	0.0591	0.0591
(F) Friedman test for within-group longitudinal changes (Pre, 1M, 6M)								(F) Friedman test for within-group longitudinal changes (Pre, 1M, 6M)								(F) Friedman test for within-group longitudinal changes (Pre, 1M, 6M)
Group	n	p (Friedman)						Group	n	p (Friedman)						Group	n	p (Friedman)
Lighthearted	38	3.31×10⁻¹³						Lighthearted	18	5.64×10⁻⁷						Lighthearted	54	1.32×10⁻¹⁸
Aggravation	21	1.07×10⁻⁷						Aggravation	41	4.18×10⁻¹⁴						Aggravation	5	0.0224
(G) Post hoc pairwise comparisons (BH-adjusted)								(G) Post hoc pairwise comparisons (BH-adjusted)								(G) Post hoc pairwise comparisons (BH-adjusted)
Group	Comparison	p_adj						Group	Comparison	p_adj						Group	Comparison	p_adj
Lighthearted	Pre vs 1M	2.42×10⁻⁷						Lighthearted	Pre vs 1M	6.42×10⁻⁴						Lighthearted	Pre vs 1M	5.02×10⁻¹⁰
Lighthearted	Pre vs 6M	2.42×10⁻⁷						Lighthearted	Pre vs 6M	6.42×10⁻⁴						Lighthearted	Pre vs 6M	5.02×10⁻¹⁰
Lighthearted	1M vs 6M	0.277						Lighthearted	1M vs 6M	0.074						Lighthearted	1M vs 6M	0.188
Aggravation	Pre vs 1M	1.92×10⁻⁴						Aggravation	Pre vs 1M	7.55×10⁻⁸						Aggravation	Pre vs 1M	0.177
Aggravation	Pre vs 6M	1.92×10⁻⁴						Aggravation	Pre vs 6M	7.55×10⁻⁸						Aggravation	Pre vs 6M	0.177
Aggravation	1M vs 6M	0.404						Aggravation	1M vs 6M	0.613						Aggravation	1M vs 6M	1
