# Supplementary material
Source: Research Square preprint supplement (doi:10.21203/rs.3.rs-9337728/v1)
Supplement: Supplementary file 3 [file e01bdad765d2e50ea30803ee.xlsx]

## Sheet: Table1
	Right-sided colon cancer
	( N=60 )
Age, years	72 [ 65 – 78 ]
Sex, n (%)
Male	31 ( 51.7 % )
Female	29 ( 48.3 % )
BMI, kg/m2	22.8 [ 20.5 - 24.8 ]
ASA, n (%)
I	16 ( 26.7 % )
II	44 ( 73.3 % )
Comorbidity, n (%)
HT	34 ( 56.7 % )
DM	8 ( 13.3 % )
CKD	1 ( 1.7 % )
CVD	2 ( 3.3 % )
Medication, n (%)
probiotics	0 ( 0 % )
PPI	11 ( 18.3 % )
antibiotics	0 ( 0 % )
Tumor location, n (%)
Vermiform appendix	2 ( 3.3 % )
Cecum	18 ( 30 % )
Ascending colon	30 ( 50 % )
Transverse colon	10 ( 16.7 % )
Operation type, n (%)
Ileocecal resection	36 ( 60 % )
Right hemicolectomy	24 ( 40 % )
Tumor size, mm	32.5 [ 16.5 - 50 ]
DPM, mm	100 [ 89 - 126 ]
DDM, mm	90 [ 80 - 102 ]
Pathological Stage TNM, n (%)
I	22 ( 36.7 % )
II	34 ( 56.7 % )
III	4 ( 6.7 % )
Table 1. Patient characteristics
Continuous variables are presented as median (interquartile range (IQR)), BMI: Body mass index, ASA: American Society of Anesthesiologists, HT: Hypertension, DM: Diabetes mellitus, CKD: Chronic kidney disease, CVD: cardiovascular disease, PPI: Proton pump inhibitor
